# Supplementary material for: Longitudinal associations between exclusive, dual and polytobacco use and respiratory illness among youth
Source: PubMed Central journal article supplement (PMC10854317; doi:10.21203/rs.3.rs-3793149/v1), 2024-01-22
Supplement: NIHPPRS3793149v1-supplement-1.pdf [file NIHPPRS3793149v1-supplement-1.pdf]

## Supplementary Files

This is a list of supplementary files associated with this preprint. Click to download.

- [SupplementaryTable1.12.21.23.docx](#)
